# Supplementary material for: Maximizing the clinical utility and performance of cytology samples for comprehensive genetic profiling – A report on the impact of process optimization through the analysis of 4,871 cytology samples profiled by MSK-IMPACT
Source: Research Square preprint supplement (doi:10.21203/rs.3.rs-4746484/v1), 2024-07-23
Supplement: Supplementary file 1 [file 283ca17ec9edb94b36940d2f.xlsx]

## Sheet: Sheet1
Tumor_Type	All	CB	ScfDNA
Lung Adenocarcinoma	1296	1220	76
Pancreatic Adenocarcinoma	691	654	37
Non-Small Cell Lung Cancer	163	155	8
Lung Squamous Cell Carcinoma	152	149	3
Small Cell Lung Cancer	145	143	2
Breast Invasive Ductal Carcinoma	116	111	5
Prostate Adenocarcinoma	82	81	1
Cancer of Unknown Primary	75	72	3
Invasive Breast Carcinoma	71	69	2
Cutaneous Melanoma	56	53	3
Adenocarcinoma, NOS	54	53	1
High-Grade Serous Ovarian Cancer	41	40	1
Colon Adenocarcinoma	34	34	0
Bladder Urothelial Carcinoma	33	21	12
Pancreatic Neuroendocrine Tumor	32	31	1
Papillary Thyroid Cancer	29	26	3
Poorly Differentiated Carcinoma, NOS	28	26	2
Intrahepatic Cholangiocarcinoma	27	27	0
Upper Tract Urothelial Carcinoma	21	11	10
Cholangiocarcinoma	20	16	4
Stomach Adenocarcinoma	20	18	2
Cancer of Unknown Primary, NOS	20	20	0
Poorly Differentiated Non-Small Cell Lung Cancer	20	20	0
Anaplastic Thyroid Cancer	17	15	2
Breast Invasive Carcinoma, NOS	17	17	0
Breast Invasive Lobular Carcinoma	17	17	0
Large Cell Neuroendocrine Carcinoma	16	15	1
Gastrointestinal Stromal Tumor	16	16	0
Head and Neck Squamous Cell Carcinoma	15	15	0
Rectal Adenocarcinoma	15	15	0
Uterine Endometrioid Carcinoma	14	14	0
Oropharynx Squamous Cell Carcinoma	11	10	1
Pleural Mesothelioma, Epithelioid Type	11	10	1
Merkel Cell Carcinoma	11	11	0
Poorly Differentiated Thyroid Cancer	11	11	0
Squamous Cell Carcinoma, NOS	11	11	0
Salivary Duct Carcinoma	10	9	1
Gallbladder Cancer	10	10	0
Hepatocellular Carcinoma	10	10	0
Neuroendocrine Carcinoma, NOS	10	10	0
Pleural Mesothelioma	10	10	0
Extrahepatic Cholangiocarcinoma	9	7	2
Esophageal Adenocarcinoma	9	9	0
Melanoma of Unknown Primary	9	9	0
Breast Invasive Cancer, NOS	8	8	0
Medullary Thyroid Cancer	8	8	0
Oral Cavity Squamous Cell Carcinoma	8	8	0
Renal Clear Cell Carcinoma	8	8	0
Uterine Serous Carcinoma/Uterine Papillary Serous Carcinoma	8	8	0
Melanoma	7	6	1
Adenoid Cystic Carcinoma	7	7	0
Cervical Squamous Cell Carcinoma	7	7	0
Lung Neuroendocrine Tumor	7	7	0
Nasopharyngeal Carcinoma	7	7	0
Small Cell Carcinoma of Unknown Primary	7	7	0
Clear Cell Ovarian Cancer	6	6	0
Colorectal Adenocarcinoma	6	6	0
Lung Carcinoid	5	3	2
Adenosquamous Carcinoma of the Pancreas	5	4	1
Cutaneous Squamous Cell Carcinoma	5	4	1
Anal Squamous Cell Carcinoma	5	5	0
Endometrial Carcinoma	5	5	0
High-Grade Neuroendocrine Carcinoma of the Colon and Rectum	5	5	0
Neuroendocrine Tumor, NOS	5	5	0
Atypical Lung Carcinoid	4	3	1
Peritoneal Mesothelioma	4	3	1
Undifferentiated Carcinoma of the Pancreas	4	3	1
Acinar Cell Carcinoma of the Pancreas	4	4	0
Adenocarcinoma of the Gastroesophageal Junction	4	4	0
Esophagogastric Adenocarcinoma	4	4	0
Gallbladder Adenocarcinoma, NOS	4	4	0
Larynx Squamous Cell Carcinoma	4	4	0
Lung Adenosquamous Carcinoma	4	4	0
Seminoma	4	4	0
Uveal Melanoma	4	4	0
Acral Melanoma	3	2	1
Head and Neck Squamous Cell Carcinoma of Unknown Primary	3	2	1
Mucinous Adenocarcinoma of the Appendix	3	2	1
Acinic Cell Carcinoma	3	3	0
Adrenocortical Carcinoma	3	3	0
Combined Small Cell Lung Carcinoma	3	3	0
Endocervical Adenocarcinoma	3	3	0
Ewing Sarcoma	3	3	0
Mammary Analogue Secretory Carcinoma of Salivary Gland Origin	3	3	0
Mixed Germ Cell Tumor	3	3	0
Mucinous Ovarian Cancer	3	3	0
Ovarian Cancer, Other	3	3	0
Perihilar Cholangiocarcinoma	3	3	0
Peritoneal Serous Carcinoma	3	3	0
Poorly Differentiated Carcinoma of the Stomach	3	3	0
Renal Cell Carcinoma	3	3	0
Salivary Carcinoma	3	3	0
Serous Ovarian Cancer	3	3	0
Signet Ring Cell Carcinoma of the Stomach	3	3	0
Synovial Sarcoma	3	3	0
Undifferentiated Pleomorphic Sarcoma/Malignant Fibrous Histiocytoma/High-Grade Spindle Cell Sarcoma	3	3	0
Angiosarcoma	2	2	0
Anorectal Mucosal Melanoma	2	2	0
Breast Mixed Ductal and Lobular Carcinoma	2	2	0
Dedifferentiated Liposarcoma	2	2	0
Desmoplastic Small-Round-Cell Tumor	2	2	0
Diffuse Large B-Cell Lymphoma, NOS	2	2	0
Head and Neck Mucosal Melanoma	2	2	0
Head and Neck Neuroendocrine Carcinoma	2	2	0
Hypopharynx Squamous Cell Carcinoma	2	2	0
Intraductal Papillary Mucinous Neoplasm	2	2	0
Neoplastic Vs Reactive	2	2	0
Osteosarcoma	2	2	0
Ovarian Carcinosarcoma/Malignant Mixed Mesodermal Tumor	2	2	0
Ovarian Epithelial Tumor	2	2	0
Pancreatic Neuroendocrine Carcinoma	2	2	0
Papillary Renal Cell Carcinoma	2	2	0
Pleural Mesothelioma, Biphasic Type	2	2	0
Sarcoma, NOS	2	2	0
Small Bowel Well-Differentiated Neuroendocrine Tumor	2	2	0
Squamous Cell Carcinoma of the Vulva/Vagina	2	2	0
Undifferentiated Malignant Neoplasm	2	2	0
Uterine Leiomyosarcoma	2	2	0
Uterine Mixed Endometrial Carcinoma	2	2	0
Chondrosarcoma	1	0	1
Neuroblastoma	1	0	1
Pilocytic Astrocytoma	1	0	1
Alveolar Soft Part Sarcoma	1	1	0
Ampullary Carcinoma	1	1	0
Angioimmunoblastic T-Cell Lymphoma	1	1	0
Appendiceal Adenocarcinoma	1	1	0
B-Lymphobastic Leukemia/Lymphoma	1	1	0
Classical Hodgkin Lymphoma	1	1	0
Clear Cell Sarcoma	1	1	0
Duodenal Adenocarcinoma	1	1	0
Embryonal Carcinoma	1	1	0
Embryonal Rhabdomyosarcoma	1	1	0
Endometrial Stromal Sarcoma	1	1	0
Epithelioid Sarcoma	1	1	0
Esophageal Poorly Differentiated Carcinoma	1	1	0
Esophageal Squamous Cell Carcinoma	1	1	0
Follicular Dendritic Cell Sarcoma	1	1	0
Follicular Thyroid Cancer	1	1	0
Gastric Type Mucinous Carcinoma	1	1	0
Gastrointestinal Neuroendocrine Tumor	1	1	0
Gastrointestinal Neuroendocrine Tumors	1	1	0
Germ Cell Tumor with Somatic-Type Malignancy	1	1	0
Gestational Trophoblastic Disease	1	1	0
Head and Neck Carcinoma, Other	1	1	0
Hepatocellular Carcinoma plus Intrahepatic Cholangiocarcinoma	1	1	0
High-Grade Neuroendocrine Carcinoma of the Esophagus	1	1	0
High-Grade Serous Fallopian Tube Cancer	1	1	0
Hurthle Cell Thyroid Cancer	1	1	0
Large Cell Lung Carcinoma	1	1	0
Leiomyosarcoma	1	1	0
Low-Grade Serous Ovarian Cancer	1	1	0
Lung Ade	1	1	0
Mature B-Cell Neoplasms	1	1	0
Metaplastic Breast Cancer	1	1	0
Mixed Ovarian Carcinoma	1	1	0
Non-Langerhans Cell Histiocytosis/Erdheim-Chester Disease	1	1	0
Ocular Melanoma	1	1	0
Other Uterine Tumor	1	1	0
Perivascular Epithelioid Cell Tumor	1	1	0
Pleural Mesothelioma, Sarcomatoid Type	1	1	0
Rhabdomyosarcoma	1	1	0
Salivary Carcinoma, Other	1	1	0
Sarcomatoid Carcinoma of the Lung	1	1	0
Serous Borderline Ovarian Tumor, Micropapillary	1	1	0
Small Cell Carcinoma of the Stomach	1	1	0
Small Intestinal Carcinoma	1	1	0
Soft Tissue Myoepithelial Carcinoma	1	1	0
Solid Pseudopapillary Neoplasm of the Pancreas	1	1	0
Solitary Fibrous Tumor/Hemangiopericytoma	1	1	0
Spindle Cell Rhabdomyosarcoma	1	1	0
Thymic Carcinoma	1	1	0
Thymic Epithelial Tumor	1	1	0
Unclassified Renal Cell Carcinoma	1	1	0
Undifferentiated Uterine Sarcoma	1	1	0
Uterine Carcinosarcoma/Uterine Malignant Mixed Mullerian Tumor	1	1	0
Uterine Neuroendocrine Carcinoma	1	1	0
Uterine Sarcoma, Other	1	1	0
Uterine Undifferentiated Carcinoma	1	1	0
Well-Differentiated Neuroendocrine Tumors of the Stomach	1	1	0
Well-Differentiated Thyroid Cancer	1	1	0
Yolk Sac Tumor	1	1	0
