# Supplementary material for: Maximizing the clinical utility and performance of cytology samples for comprehensive genetic profiling – A report on the impact of process optimization through the analysis of 4,871 cytology samples profiled by MSK-IMPACT
Source: Research Square preprint supplement (doi:10.21203/rs.3.rs-4746484/v1), 2024-07-23
Supplement: Supplementary file 2 [file 52dcc9eb4caf81d57f6f01bc.xlsx]

## Sheet: Sheet1
	All Cases			Inhouse			Outside
Year	Failure (n)	Success (n)	Percent Successful	Failure (n)	Success (n)	Percent Successful	Failure (n)	Success (n)	Percent Successful	Chi-square test
2014	22	95	0.81	14	51	0.78	8	44	0.85	NS	p = 0.4
2015	11	287	0.72	73	199	0.73	38	88	0.7	NS	p = 0.5
2016	128	397	0.76	83	242	0.74	45	155	0.78	NS	p = 0.4
2017	155	481	0.76	95	279	0.75	60	202	0.77	NS	p = 0.5
2018	126	448	0.78	66	268	0.8	60	180	0.75	NS	p = 0.13
2019	97	548	0.85	42	316	0.88	55	232	0.81	p < 0.01	p < 0.01
2020	79	433	0.85	38	268	0.88	41	165	0.8	NS	p = 0.02
2021	73	541	0.88	30	383	0.93	43	158	0.79	p < 0.01	p < 0.01
2022	50	386	0.89	24	270	0.92	26	116	0.82	p < 0.01	p < 0.01
All Years	50	3616	0.81	465	2276	0.83	376	1340	0.78	p < 0.01	p < 0.01
