# Supplementary material for: Maximizing the clinical utility and performance of cytology samples for comprehensive genetic profiling – A report on the impact of process optimization through the analysis of 4,871 cytology samples profiled by MSK-IMPACT
Source: Research Square preprint supplement (doi:10.21203/rs.3.rs-4746484/v1), 2024-07-23
Supplement: Supplementary file 3 [file f3f8a7e9ada14c65fb9abc7a.xlsx]

## Sheet: Sheet1
		Total_Count									Proportion
Sample	type	Level_1	Level_2	Level_3A	Level_3B	Level_4	Resistance	Oncogenic	No_Level		Level_1	Level_2	Level_3A	Level_3B	Level_4	Resistance	Oncogenic	No_Level
CB	Surgical	14	2	10	36	41	28	302	1130		0.05	0.181818	0.151515	0.209302	0.232955	0.41791	0.223208	0.325836
CB	Shared	261	5	54	100	101	18	801	1449		0.932143	0.454545	0.818182	0.581395	0.573864	0.268657	0.592018	0.41782
CB	Cytology	5	4	2	36	34	21	250	889		0.0178571	0.363636	0.030303	0.209302	0.193182	0.313433	0.184775	0.256344
CB	Total	280	11	66	172	176	67	1353	3468
ScfDNA	Surgical	4	0	3	11	10	0	60	259		0.173913	0	0.272727	0.423077	0.344828	0	0.384615	0.585973
ScfDNA	Shared	19	1	8	10	14	2	78	110		0.826087	1	0.727273	0.384615	0.482759	0.5	0.5	0.248869
ScfDNA	Cytology	0	0	0	5	5	2	18	73		0	0	0	0.192308	0.172414	0.5	0.115385	0.165158
ScfDNA	Total	23	1	11	26	29	4	156	442
ScfDNA	mutations	proportion
Total Shared	241	0.348266
Total Cyto	103	0.148844
Total Surg	348	0.50289
Total Mutations	692
CB	mutations	proportion
Total Shared	2789	0.498659
Total Cyto	1241	0.221884
Total Surg	1563	0.279456
Total Mutations	5593
