# Supplementary material for: Maximizing the clinical utility and performance of cytology samples for comprehensive genetic profiling – A report on the impact of process optimization through the analysis of 4,871 cytology samples profiled by MSK-IMPACT
Source: Research Square preprint supplement (doi:10.21203/rs.3.rs-4746484/v1), 2024-07-23
Supplement: Supplementary file 4 [file fc1232431f8fdbcbf3e310e9.xlsx]

## Sheet: Sheet1
Optimization Method	Laboratory	Implementation Year	Benefit Outcome	Description
Modified HistoGel Cell-Block	Cytology	2014	Increased tissue/tumor yield in cell block samples	FFPE cytology sample prepared by a HistoGel cell bock method with the modification of pretreatment by 95% ethanol.
Supernatant cfDNA Protocol	Cytology	2014	Provides an additional source of genomic material utlizing residual CytoLyt supernatant fluid.	Residual CytoLyt supernatant that is traditionally discarded is further spun down to a pellet and treated with isopropanol. Additional genomic material is therefore rescued in cases where all other tissue sources are exhausted.
Mineral Oil Deparaffinization	Molecular	2014	Increased DNA yield in the extraction of FFPE material. Reduces hands-on labor and processing of FFPE samples.	Deparaffinization of FFPE samples carried out with mineral oil.
Bead-Extraction Optimization	Molecular	2018-2019	Improved DNA extraction and purification	Bead-extraction procedures optimized for DNA extraction and purification prior to library preparation.
Dual index Sequencing	Molecular	2020	Increased accuracy of sample identification and improved efficiency in processing.	Two additional reads are included in a sequencing run allowing for greater accuracy and efficiency. With an increase number of unique barcode combinations, sequencing errors are decreased with reduced index hopping and misaligned/misread reads.
Lower DNA Yield Threshold	Molecular	2021	Due to improved extraction and sequencing methods, a lower DNA extraction yield could be tolerated for sequencing in samples that otherwise would have been inadequate.	The minimum DNA extraction yield required to proceed with sequenccing was lowered from 0.9 ng/mL (49 ng) to 0.54 ng/mL (<30 ng).
